# Supplementary material for: Exploratory and confirmatory factor analyses identify three structural dimensions for measuring physical function in community-dwelling older adults
Source: PeerJ. 2023 Apr 21;11:e15182. doi: 10.7717/peerj.15182 (PMC10355189; doi:10.7717/peerj.15182)
Supplement: Supplemental Information 1 — The Group 1 and Group 2 data were used for statistical analysis to cross-validate the model fit. [file peerj-11-15182-s001.xlsx]

## Sheet: Sheet1
No.	Gerder	Age	Height	Weihtt	BMI	WC	HC	WHR	Spirometry	ST	HS	ACT	CST	BST	CSRT	OLS	TUG	UWS	MWS
1	1	74	1.6	55.6	21.7	85.4	90.1	0.95	1576	69	28.5	11	12	-2.5	-4	35.8	0.64	1.2	1.46
2	2	74	1.63	80.9	30.4	103	113	0.91	1052	112	18.5	20	16	-7.2	-14.2	16.5	0.71	1.17	1.42
3	1	74	1.69	52.15	18.3	76	90	0.84	2312	96	31.9	12	14	-3	-8	29.8	0.74	1.05	1.28
4	1	74	1.72	67.75	22.9	89.6	95	0.94	1666	82	37.7	18	15	-11.4	-5.3	5.7	0.76	1.26	1.52
5	2	74	1.64	59.15	22	79.9	98.1	0.81	1082	107	27.6	22	19	3.7	-7.4	4.9	0.77	1.49	1.9
6	1	74	1.65	60.8	22.3	86.5	92.3	0.94	2653	105	30.4	20	21	-5	-12	12.4	0.82	1.18	1.51
7	1	74	1.63	55.9	21	73	93	0.78	3163	97	38.7	20	27	-8.8	-8.8	60	0.91	1.25	1.96
8	2	74	1.54	52.3	22.1	85	94.3	0.9	1289	101	21.8	17	26	2.1	5.2	3.1	0.93	1.59	2.11
9	2	74	1.59	67.7	26.8	90.3	99.2	0.91	1280	99	28.4	17	15	0	16.4	8.5	1	1.6	2.22
10	2	73	1.56	55.6	22.8	76.5	95.6	0.8	2183	98	16.4	12	15	-6	0	60	0.75	1.38	1.64
11	1	73	1.71	65.45	22.4	98.2	93.3	1.05	1896	109	33.6	18	18	-17.5	-8.6	12.6	0.76	1.05	1.51
12	2	73	1.54	56.3	23.7	78.1	90.3	0.86	2064	105	21.5	17	21	-5.8	4.7	46.6	0.77	1.08	1.4
13	2	73	1.53	64.5	27.6	98.2	103.5	0.95	2290	115	22.6	24	14	2.5	-13.8	5	0.8	1.33	1.56
14	2	73	1.57	62.1	25.2	90.8	95.7	0.95	2507	110	32.1	20	27	-4	0	60	0.84	1.32	1.72
15	2	73	1.67	63.5	22.8	85.4	99.8	0.86	2559	115	27.6	20	15	6.7	4.5	3.2	0.86	1.49	1.76
16	2	73	1.56	66.35	27.3	89.7	102.7	0.87	1783	101	25.1	22	21	-27	9.9	9.3	0.86	1.37	1.79
17	1	73	1.76	68.15	22	84.9	91.5	0.93	4012	80	37.1	22	16	-1	-6	4.3	0.88	1.39	2.09
18	2	73	1.42	42.45	21.1	75.9	86.5	0.88	1355	105	19.2	21	22	2.5	17	24.9	0.92	1.43	2.31
19	2	73	1.59	70.15	27.7	99	104.5	0.95	1289	124	27.2	17	23	-10.3	10.9	3.9	0.99	1.46	1.85
20	2	73	1.5	48.75	21.7	74.1	88.5	0.84	1731	109	24.1	20	18	3.3	1.1	14.3	0.99	1.21	1.9
21	2	73	1.59	66.55	26.3	86.3	101.8	0.85	1199	112	29.9	25	19	-9.4	11.4	40.8	0.99	1.6	1.83
22	2	73	1.69	63.1	22.1	89.4	97.1	0.92	1127	139	26	19	14	3.4	0	34.9	1.05	2.08	2.5
23	1	73	1.71	52.85	18.1	74.1	88.7	0.84	2673	90	32.2	20	14	-1.9	-9.5	8.8	1.07	1.36	1.94
24	1	72	1.63	60.85	22.9	88.7	98.1	0.9	2701	85	37.6	17	16	-21	-22.4	53.8	0.78	1.45	1.92
25	1	72	1.71	64.3	22	82.8	93.8	0.88	2855	100	34.3	16	18	-12.5	0	54	0.79	1.2	1.65
26	1	72	1.69	54.1	18.9	79.9	93.1	0.86	2564	88	24.3	14	10	0	-16	4.7	0.86	1.32	1.46
27	1	72	1.75	56.4	18.4	84.5	96.5	0.88	2181	116	25.1	26	16	-11	0.1	5	0.87	2.13	2.64
28	2	72	1.51	47.4	20.8	83.4	88	0.95	701	120	20	16	13	0	0	60	0.89	1.38	1.78
29	2	72	1.55	47.1	19.6	74	84.6	0.87	1815	122	24.7	25	20	-4.5	5.1	60	0.91	1.38	1.56
30	1	72	1.67	57.95	20.8	85	90	0.94	1960	76	24.4	11	14	-8	-6.5	4.7	0.93	1.52	1.85
31	1	72	1.77	54.7	17.5	77.5	89.1	0.87	2204	84	31.2	18	18	5.1	-17.6	21.4	1	1.22	1.72
32	1	72	1.75	78.65	25.7	98.3	103.9	0.95	2173	100	44.3	24	22	2.1	3.3	4.9	1.2	2.02	2.1
33	1	71	1.6	63.1	24.6	87	97	0.9	2309	66	35.6	23	20	-20	2	10	0.67	1.41	1.81
34	1	71	1.82	80.1	24.2	98.7	102.7	0.96	3480	70	34.1	17	12	12.4	-12.8	4	0.68	1.12	1.33
35	2	71	1.63	48.1	18.1	85.3	86.5	0.99	2435	118	21.2	18	21	0	7.2	10.7	0.7	1.34	1.57
36	1	71	1.7	71.55	24.8	94.3	100.3	0.94	1267	97	38.3	23	17	-8	-5.2	60	0.86	1.52	2.11
37	2	71	1.63	64	24.1	87.8	93.4	0.94	2822	81	27.4	29	21	1.6	7.5	60	0.87	1.76	1.82
38	1	71	1.74	66.7	22	90	99.6	0.9	1332	123	34.1	21	13	2	-9.8	60	0.93	2.04	2.29
39	1	71	1.64	59.2	22	76.4	96.9	0.79	238	110	32.3	24	19	-8.1	8.7	33.4	0.96	1.61	1.89
40	2	71	1.53	50.9	21.7	70.6	91.3	0.77	1929	116	24.7	17	16	1.2	4.9	12.2	0.99	1.39	1.89
41	2	71	1.64	74.5	27.7	99.1	109.8	0.9	1282	105	29	20	12	0.6	0	18.9	1.08	1.49	2.13
42	1	71	1.73	63.25	21.1	79.9	95.5	0.84	2388	94	33.1	18	15	-12.6	1.2	60	1.12	1.57	1.92
43	1	70	1.64	78.65	29.2	104	112.8	0.92	1919	81	38.3	17	11	-11	-24.2	24.6	0.72	1.15	1.38
44	2	70	1.63	70.15	26.4	97.3	108.5	0.9	1888	118	26.6	14	13	-12.5	-10.8	22.3	0.76	1.15	1.43
45	1	70	1.73	77.6	25.9	94.7	99.8	0.95	1322	107	34.3	25	15	-10.6	-19.7	29.6	0.8	1.37	1.75
46	2	70	1.53	57.65	24.6	89	100	0.89	1174	110	26.7	18	20	6	8	18.4	0.81	1.49	2.02
47	2	70	1.64	76.6	28.5	105	112	0.94	452	101	23.6	18	16	-18.4	-10.9	15.5	0.82	1.07	1.46
48	1	70	1.85	80.9	23.6	91.5	105.7	0.87	3381	102	40.6	26	17	2	1.8	60	0.87	1.46	2.02
49	2	70	1.55	63.95	26.6	86.7	90.5	0.96	691	118	31	20	20	-6.2	1.4	50.8	0.91	1.26	1.63
50	2	70	1.54	61.6	26	92.9	101.4	0.92	1891	118	21.8	21	13	-20	5	3.5	0.93	1.81	2.21
51	2	70	1.54	50.9	21.5	76.3	93.5	0.82	2326	106	27.1	19	19	4.8	11.9	23.3	0.96	1.39	1.63
52	1	70	1.73	73.55	24.6	85.6	102.1	0.84	2723	104	46.9	24	14	-11.7	-8.1	50.6	0.96	1.67	1.75
53	2	70	1.55	57.3	23.9	81.8	96.4	0.85	1875	116	20.3	20	19	-7.1	-3.6	60	1	1.38	1.62
54	2	70	1.58	59.4	23.8	79.8	97.6	0.8	2928	118	24.8	25	22	1.6	6.6	19.5	1.12	1.48	1.74
55	2	69	1.59	60.65	24	92	98	0.94	2419	92	25.9	15	19	-1	23	12.6	0.74	1.55	1.81
56	2	69	1.55	65.6	27.3	92	106	0.87	1342	89	25.3	18	13	10.1	-7.6	60	0.75	0.93	1.36
57	2	69	1.54	55.5	23.4	83	90.6	0.92	752	110	23	16	19	3	4.5	11.2	0.79	1.71	2.06
58	2	69	1.71	68.25	23.3	89.4	106.7	0.84	1540	99	27.4	22	18	12.2	3.3	5	0.8	1.29	1.56
59	1	69	1.66	66.1	24	78.7	97.8	0.8	2568	99	25.9	16	13	4	2.5	18.6	0.85	1.41	1.49
60	1	69	1.58	64.15	25.7	96.3	109.5	0.88	1641	88	23.2	13	19	4.8	6.6	17.2	0.88	1.26	1.43
61	2	69	1.67	66.1	23.7	89	96	0.93	1706	97	19	20	15	-5.2	20.2	27.7	0.9	1.22	1.71
62	2	69	1.53	58.3	24.9	87.6	99.2	0.88	1121	128	26.6	27	24	-9.5	2.4	43.6	0.92	1.27	1.6
63	2	69	1.62	61.15	23.3	93.2	101	0.92	1373	108	19.7	23	14	0.6	0	3.7	0.92	1.49	1.86
64	2	69	1.62	67.35	25.7	102	98	1.04	871	102	27.3	23	15	16	-0.8	10.3	1.01	1.03	1.48
65	2	69	1.47	42.1	19.5	66.5	83.3	0.8	1191	97	29.1	24	26	10	14.5	60	1.04	1.46	2
66	2	69	1.61	53.5	20.6	72	94	0.77	1398	132	22.8	21	20	3.9	25.5	60	1.05	1.57	1.81
67	2	68	1.51	68.25	29.9	98	105	0.93	1792	87	21.2	20	23	-19	-1	5.8	0.68	1.12	1.51
68	1	68	1.67	54.5	19.5	78	96.5	0.81	3090	99	31.4	20	17	-15.6	0	29	0.71	1.51	1.67
69	2	68	1.53	48.8	20.8	78.1	83.2	0.94	1237	106	21.9	21	22	2	-2.2	37.4	0.76	1.26	1.7
70	2	68	1.67	69.5	24.9	86.5	101	0.86	1473	118	30.9	25	23	-16.5	0.7	5.5	0.82	1.84	2.87
71	1	68	1.66	54.3	19.7	82.2	91.8	0.9	3181	106	31.1	19	16	-8	19.4	60	0.83	1.92	2.28
72	2	68	1.61	57.5	22.2	80	97	0.82	2877	103	28.1	20	16	8.5	12.7	6.1	0.83	1.01	1.89
73	2	68	1.54	49.4	20.8	77.9	90.9	0.86	2363	114	20.7	17	16	3	8.6	60	0.84	1.97	2.16
74	2	68	1.53	48.6	20.8	81.1	89.3	0.91	1599	63	21.5	20	18	-18.5	9.9	5.7	0.85	1.1	1.79
75	1	68	1.64	69	25.7	90	97	0.93	1374	108	28.4	16	18	-20	3	34.2	0.86	1.73	1.91
76	2	68	1.62	72.25	27.5	104	111	0.94	2604	114	24.3	17	16	5	-15	11.3	0.88	1.28	1.66
77	1	68	1.73	74.55	24.9	96.9	101.2	0.96	2232	64	33.6	23	18	-7.8	-21.4	11.8	0.89	1.53	1.99
78	1	68	1.76	88	28.4	96.7	103.7	0.93	3632	87	44.5	19	10	-10.1	16.8	60	0.91	1.28	1.61
79	1	68	1.79	68.65	21.4	95.5	101.2	0.94	3195	125	39.7	15	14	-30.5	-5.6	51.3	0.96	1.41	1.98
80	2	68	1.62	61.8	23.5	81	93.5	0.87	1227	102	24.1	22	15	1.5	1.2	4.2	0.98	1.64	2.68
81	2	68	1.56	54.9	22.6	78.3	96.5	0.8	2116	105	26.9	19	16	3.3	5.6	60	1.19	1.61	1.9
82	2	67	1.52	58.9	25.5	86.3	101.1	0.85	802	98	17.6	23	22	-12	-2	3.2	0.66	0.97	1.33
83	1	67	1.7	58.8	20.3	83.2	92.4	0.9	3537	96	41.7	16	23	5.5	-10	60	0.68	1.17	1.45
84	1	67	1.68	63.6	22.5	84.7	96.7	0.88	2354	87	35.3	20	20	-7.7	3.8	50.8	0.71	1.24	1.64
85	2	67	1.6	52.9	20.7	86.3	95.2	0.91	1398	101	21.6	12	11	-18.5	3	6.1	0.74	1.32	1.61
86	2	67	1.57	54.95	22.3	78	97	0.8	1613	97	26.2	20	21	3.1	5.5	5.6	0.74	1.26	1.51
87	2	67	1.58	58.45	23.4	88.9	98.1	0.91	1089	114	21	19	16	-14.9	-14.3	25.8	0.75	1.25	1.48
88	1	67	1.69	65.4	22.9	81.5	95.6	0.85	2485	108	36.4	22	17	-25	-14.6	3.7	0.76	1.26	1.64
89	2	67	1.59	78.1	30.9	99.3	102.1	0.97	1290	123	24.8	19	15	-20.3	-0.8	7.3	0.86	1.25	1.58
90	1	67	1.67	66.2	23.7	85.5	97.9	0.87	2412	113	38.7	18	16	-12.5	2	60	0.87	2.13	2.37
91	1	67	1.53	61.85	26.4	87.4	99.9	0.87	1184	99	27.5	20	21	-9.5	-2.9	24	0.91	1.01	1.41
92	1	67	1.75	52.07	17	110.6	108.9	1.02	1315	85	43	18	15	-15.7	-19.1	25	0.92	0.94	1.31
93	1	67	1.69	73.05	25.6	96.5	102.5	0.94	2233	112	38	15	15	-20.5	-8.2	12.4	0.94	1.44	1.94
94	2	67	1.62	60.5	23.1	85	98	0.87	1166	91	30.1	17	20	2.4	2.2	60	0.95	1.29	1.58
95	1	67	1.66	70.2	25.5	89	97	0.92	2776	112	43.3	31	24	-11.5	10	20.5	0.95	1.94	1.43
96	1	67	1.68	75.6	26.8	97	104	0.93	3416	94	41	20	19	-8.8	0	60	1	1.16	1.86
97	2	67	1.62	64.1	24.4	87	101	0.86	3167	115	28.5	23	28	6.6	20.1	60	1.02	1.3	1.71
98	1	67	1.7	62.25	21.5	85	96	0.89	3173	109	39.5	24	28	1	5	60	1.07	1.54	2.14
99	2	67	1.6	59.1	23.1	87.8	101.1	0.87	1819	94	23.5	17	20	3.6	-4.7	60	1.11	1.4	1.79
100	2	67	1.64	64.25	23.9	80.6	98.7	0.82	1799	104	25.6	20	17	3.1	-8	8.2	1.25	1.62	2.01
101	1	66	1.77	75.6	24.1	97	94.9	1.02	3085	81	36.6	16	15	2.1	0	2.9	0.7	1.29	2
102	2	66	1.68	64.05	22.7	83.6	95.8	0.87	108	76	25.1	19	14	4.7	14	48.1	0.75	1.33	1.63
103	2	66	1.55	54.6	22.7	85	94	0.9	1997	115	21.9	23	19	-1.7	-2	10.2	0.76	1.01	1.31
104	2	66	1.62	69.95	26.7	91.2	103.8	0.88	417	102	20.4	25	18	6	4	11.2	0.8	1.62	1.86
105	2	66	1.64	73.4	27.3	98.8	107	0.92	2515	99	27.5	17	13	-9.6	4.5	1.8	0.81	1.37	1.55
106	1	66	1.72	70.25	23.7	90.8	93.6	0.97	2942	116	37.1	24	25	-19.7	-10.3	60	0.94	1.66	2.06
107	2	66	1.62	52.6	20	72.8	90.7	0.8	1540	114	24.6	17	19	-3.2	5.3	6.5	0.99	1.46	1.6
108	2	66	1.56	55.45	22.8	85.1	92	0.93	1486	134	22.1	28	24	0.1	0.1	1	0.99	1.67	2.28
109	2	66	1.55	58.7	24.4	85.3	99.7	0.86	2189	115	29.9	19	15	7.3	8.5	35.5	1	1.41	1.62
110	2	66	1.49	51.2	23.1	87.7	93.3	0.94	1907	100	24.2	18	20	-27.6	-23.4	25.8	1.12	1.76	2.11
111	2	66	1.58	63.35	25.4	94.1	110.1	0.85	1482	108	17.7	18	13	-7.2	3.4	11.9	1.15	1.49	1.79
112	2	66	1.57	67.35	27.3	85.2	102.2	0.83	1327	115	31.3	32	21	-14.2	2.7	48.3	1.27	1.63	2.11
113	2	65	1.64	80.45	29.9	107	114	0.94	639	92	22.1	16	13	-9.1	-3.1	1.9	0.72	1.05	1.35
114	2	65	1.58	64.05	25.7	92	105.5	0.87	1324	71	20	16	21	-3.8	3.8	22.1	0.82	1.45	1.52
115	2	65	1.5	47.65	21.2	76	89	0.85	1078	110	19.4	19	23	0.5	5.5	38.6	0.82	1.2	1.43
116	2	65	1.63	55.25	20.8	81.5	97.4	0.84	2163	101	21.2	20	17	9.8	9.2	50	0.83	1.33	1.46
117	2	65	1.7	57.25	19.8	87.6	100.1	0.88	752	103	18.5	13	10	-11	-16.6	8.7	0.83	1.39	1.88
118	2	65	1.61	62.3	24	96	103	0.93	2464	121	26.3	18	29	2.3	3.3	60	0.85	1.27	1.57
119	2	65	1.58	56.9	22.8	81.5	93.7	0.87	2605	106	25.4	15	14	6.5	-4.6	22.9	0.85	1.35	1.9
120	2	65	1.49	46.6	21	76.7	87.6	0.88	1027	77	17.1	18	22	7.2	3.6	21.6	0.87	1.49	1.86
121	1	65	1.52	59.35	25.7	84.9	93.7	0.91	2812	122	32.2	22	21	-12	-7.6	33.5	0.87	1.78	2.08
122	2	65	1.59	68.5	27.1	96.7	104.2	0.93	1171	99	24.1	22	26	-27.6	3.3	50.8	0.89	1.27	1.85
123	2	65	1.62	62.45	23.8	85.5	102	0.84	1945	90	27.9	19	14	-12.5	-23	17.6	0.92	1.29	1.56
124	1	65	1.72	72.05	24.4	96.4	98.9	0.97	2539	110	33.9	24	15	-23.5	-6.6	19.6	0.93	1.12	1.59
125	2	65	1.63	59.8	22.5	90.1	101.3	0.89	1102	104	28.5	22	21	7.4	10.8	12.1	0.94	1.5	2.05
126	2	65	1.51	64.9	28.5	89	97	0.92	1209	90	24.6	21	22	8.2	15.3	21.8	0.97	1.31	1.7
127	2	65	1.62	68.8	26.2	91	104	0.88	1634	110	25.4	28	28	-10.8	4	8.3	0.97	1.15	1.6
128	2	65	1.57	68.4	27.7	91.3	98.5	0.93	1695	115	19.6	24	14	-9.5	-13.5	21.4	1.03	2.13	2.75
129	1	65	1.72	72.45	24.5	93.4	101.3	0.92	3445	97	42.6	23	16	-8.2	-2.8	8.3	1.04	1.25	1.75
130	2	65	1.68	65.7	23.3	88.9	97.8	0.91	2035	101	31.5	25	17	-9.1	1.8	60	1.3	1.54	2.17
131	2	65	1.61	57.8	22.3	75.4	98.6	0.8	1037	121	28.5	26	20	1.2	3.4	44.9	1.32	1.92	2.23
132	1	64	1.59	67.7	26.8	92	98	0.94	1273	103	34.7	21	25	-7	-8	9.3	0.68	1.17	1.36
133	2	64	1.61	63.25	24.4	93	100	0.93	2832	108	22.8	24	25	-4.5	7	3	0.73	1.27	1.5
134	1	64	1.65	64.8	23.8	78.7	96	0.82	3883	98	37.7	18	12	-27.4	-4.2	13.4	0.75	1.45	2.09
135	2	64	1.55	55.5	23.1	79	94.5	0.84	981	125	22.6	21	17	-9.5	5.7	60	0.78	2	2.45
136	2	64	1.58	58.95	23.6	88	98	0.9	1659	105	24.9	18	14	-30	10	10.5	0.82	1.29	1.68
137	2	64	1.58	54.15	21.7	68	88	0.77	1468	109	25.3	21	18	12.3	15.5	60	0.87	0.95	1.34
138	2	64	1.64	77.7	28.9	98.5	109	0.9	2849	96	32	20	16	-8	-3	60	0.91	1.59	1.92
139	2	64	1.61	64.4	24.8	86.8	102.5	0.85	1057	106	22.7	12	13	-13.6	2.5	19.7	0.92	1.38	1.67
140	2	64	1.51	69.8	30.6	92	97	0.95	622	96	16.9	14	18	1.5	-6.5	50.8	0.92	1.21	1.58
141	2	64	1.56	57.6	23.7	92	98	0.94	1569	100	23.8	26	14	-10.3	17.8	16.7	0.92	1.55	1.97
142	2	64	1.63	67.85	25.5	84	103	0.82	2291	130	25.4	16	15	6.5	10	60	0.93	1.19	1.73
143	1	64	1.63	64.15	24.1	82.7	96.7	0.86	3529	97	38.7	20	16	6.2	-8.4	51.7	0.95	1.27	2.11
144	2	64	1.52	45.1	19.5	74.5	90	0.83	1318	119	16.2	16	16	0	-3.3	15.3	0.96	1.35	1.67
145	2	64	1.72	76.75	25.9	101.8	100.6	1.01	2091	102	26	17	14	2.1	1.3	15	0.98	1.41	1.83
146	2	64	1.59	60.9	24.1	87.6	95.7	0.92	1280	118	25.1	24	20	0	0	53	0.99	1.28	1.74
147	2	64	1.55	56	23.3	76.8	95.6	0.8	1591	98	23.3	19	16	-4.2	-6.7	8.4	1.08	1.52	1.92
148	2	64	1.6	48.2	18.8	69.5	89.1	0.78	2022	106	20.7	17	20	10	18	60	1.08	1.63	1.94
149	2	64	1.66	61.15	22.2	77	98.2	0.78	2308	105	25.6	24	17	5	5.5	60	1.09	2.25	2.73
150	2	64	1.67	62.6	22.4	89.9	94.9	0.95	2118	105	30.7	20	17	-7.4	0	60	1.16	1.42	2.24
151	2	63	1.59	53.5	21.2	90	102	0.88	2015	88	24.9	18	13	3	11.2	60	0.76	1.12	1.74
152	2	63	1.62	53.45	20.4	76.6	94.7	0.81	1284	97	19.3	11	16	-6.5	6.3	10.7	0.76	1.4	1.73
153	2	63	1.65	51.25	18.8	72	87	0.83	2204	100	20.1	25	18	1	1	36.4	0.79	1.45	1.97
154	2	63	1.63	57	21.5	80.3	97.2	0.83	1869	98	19.2	11	12	-2.5	2.9	34	0.85	1.33	1.6
155	2	63	1.68	69.9	24.8	92.5	105.3	0.88	1782	102	31.3	17	16	3.2	9.5	8.8	0.89	1.27	1.68
156	2	63	1.56	48.55	19.9	73	88	0.83	1999	74	18.2	15	17	2.5	20	60	0.89	1.15	2.2
157	2	63	1.61	62.3	24	89.4	90.8	0.98	2466	116	27.2	18	16	6.6	6.6	59.6	0.91	2.05	2.46
158	1	63	1.61	56.75	21.9	75.8	88.4	0.86	2294	108	28.5	19	17	4.5	25.3	60	0.92	1.49	1.82
159	2	63	1.57	60.8	24.7	82.7	97.6	0.85	2340	103	27.9	23	23	10.8	9.8	51.2	0.98	1.5	1.79
160	2	63	1.48	49.6	22.6	77	86	0.9	1983	120	23.7	18	19	-2.5	13.4	60	1.02	1.32	1.83
161	2	63	1.58	53.15	21.3	84.1	90.8	0.93	2048	95	24.6	24	22	11.1	-7.5	25.5	1.11	1.2	2.05
162	1	63	1.57	69.8	28.3	102.5	100	1.03	2183	117	39.7	18	17	3.5	15.9	60	1.13	1.49	1.62
163	2	63	1.6	57.95	22.6	83.4	87	0.96	1447	112	27.1	17	18	2.1	4.3	60	1.16	1.57	1.87
164	2	63	1.61	65.75	25.4	92.1	102	0.9	2363	115	28.5	22	26	2.1	17.2	16.4	1.22	1.85	2.4
165	1	63	1.71	77.9	26.6	90.1	102.3	0.9	3603	112	47.3	26	19	2.7	1.1	41.2	1.3	1.94	2.53
166	1	62	1.72	71.8	24.3	94.1	97	0.97	2374	66	33.7	13	13	-29.8	-21.1	12.5	0.74	1.03	1.24
167	1	62	1.83	59.55	17.8	72.5	90.2	0.8	3039	81	38.1	27	15	10.1	-7.4	50.8	0.76	1.36	1.66
168	2	62	1.72	83.55	28.2	91.2	112.8	0.81	2348	120	35.8	29	13	-23.3	-7.7	4.3	0.83	1.4	1.73
169	2	62	1.63	58.6	22.1	79.2	94.5	0.84	1689	126	24.9	17	15	-6.6	7.5	22.7	0.86	1	1.53
170	2	62	1.57	55.4	22.5	77.8	90.1	0.86	1215	98	26.3	13	25	1.2	19.5	60	0.86	1.24	1.84
171	2	62	1.53	50.05	21.4	82	92	0.89	1388	107	18.1	18	17	-12.4	0	40.3	0.87	1.14	1.5
172	2	62	1.53	63.95	27.3	90.6	100.2	0.9	1289	142	20.9	19	15	-7.1	-5.5	39.7	0.9	1.19	1.7
173	2	62	1.73	81.5	27.2	95	114	0.83	3524	125	33.7	23	20	2.8	-12.1	55.2	0.93	1.21	1.79
174	1	62	1.71	77.1	26.4	97	101	0.96	4068	90	37	19	16	-8.6	9.8	56.9	0.96	1.14	1.6
175	1	62	1.7	78.3	27.1	88.7	102.5	0.87	1965	110	42.4	19	13	-12.4	-12	60	0.96	1.27	1.72
176	2	62	1.56	58.95	24.2	88.6	96.2	0.92	1807	117	19	16	15	0	0	60	0.97	1.74	1.81
177	2	62	1.61	55.65	21.5	73	94	0.78	2198	90	25.5	21	28	7	23	11.8	0.99	1.71	2.14
178	2	62	1.58	60.1	24.1	75.7	94.1	0.8	1869	143	32.9	28	30	4.2	15.1	60	1.12	1.39	1.88
179	2	62	1.54	55.8	23.5	82.3	90.9	0.91	1598	108	28.4	20	21	3.2	8.6	15.3	1.13	1.57	1.86
180	2	61	1.5	58.6	26	83.3	95.6	0.9	1219	107	24.9	16	15	-4.3	3.1	3.1	0.8	1.21	1.39
181	2	61	1.58	63	25.2	91	101	0.9	1207	95	21.9	21	19	-7.2	11.3	14.9	0.85	1.63	1.73
182	1	61	1.71	62.1	21.2	78	92.7	0.84	3666	108	31.6	17	18	-26.2	-14.5	22.1	0.93	1.34	1.67
183	1	61	1.73	72.5	24.2	97.5	98	0.99	1913	88	35	28	15	-14.6	-8	5.6	0.98	1.52	2.49
184	2	61	1.63	49.15	18.5	67.2	92.3	0.73	1705	120	18.3	28	27	-11	4	50.4	0.99	1.49	1.73
185	1	61	1.73	60.3	20.1	91.2	101.1	0.9	2334	105	40.1	22	22	1.5	-9.7	49.2	1.14	1.71	2.49
186	2	60	1.55	54.3	22.6	75.4	89	0.85	1801	99	18.1	15	20	4	17	33.7	0.78	1.31	1.73
187	2	60	1.55	57.25	23.8	82	97	0.85	1816	102	29.3	24	29	-5.5	4	60	0.88	1.42	1.7
188	2	60	1.63	77.1	29	108.2	101.3	1.07	1579	118	25.6	18	11	-6.3	5	60	0.96	1.52	1.69
189	2	60	1.69	59.25	20.7	75.6	95	0.8	2031	107	25.5	18	18	4.8	12.3	33.4	1.11	1.87	1.96
190	2	60	1.57	70.7	28.7	99.3	106.3	0.9	2149	102	37.1	22	18	-10.1	1	60	1.16	1.57	1.92
