# Supplementary material for: Exploratory and confirmatory factor analyses identify three structural dimensions for measuring physical function in community-dwelling older adults
Source: PeerJ. 2023 Apr 21;11:e15182. doi: 10.7717/peerj.15182 (PMC10355189; doi:10.7717/peerj.15182)
Supplement: Supplemental Information 2 — The Group 1 and Group 2 data were used for statistical analysis to cross-validate the model fit. [file peerj-11-15182-s002.xlsx]

## Sheet: Sheet1
No.	Gender	Age	Height	Weihtt	BMI	WC	HC	WHR	Spirometry	ST	HS	ACT	CST	BST	CSRT	OLS	TUG	UWS	MWS
1	1	74	1.65	74.3	27.3	98	99	0.99	2188	98	37	16	12	-22.6	-7.3	2.5	0.72	1.07	1.44
2	1	74	1.64	65.2	24.2	90	97.8	0.92	2847	102	32	11	15	1.5	-4	60	0.77	1.28	1.69
3	2	74	1.62	67.45	25.7	95	110	0.86	1256	108	27	18	16	-2.3	5.2	9	0.79	1.47	1.6
4	2	74	1.59	61.7	24.4	90	95.8	0.94	1366	115	26	20	23	0	1.2	33.5	0.8	1.25	1.51
5	1	74	1.71	71.3	24.4	94.8	96.4	0.98	3030	117	41	25	16	-16.5	-13.8	20.4	0.84	1.21	2.09
6	2	74	1.59	46.15	18.3	76.2	89.1	0.86	924	108	24	17	13	-10.2	0	4	0.87	1.45	1.83
7	2	74	1.59	59.05	23.4	82	99.6	0.82	2313	75	17	21	23	6.5	17.6	18.8	0.89	1.49	1.98
8	2	74	1.56	55.25	22.7	93	94.5	0.98	931	114	20	28	17	-9.7	0	4.8	0.9	1.86	2.82
9	1	74	1.7	62.55	21.6	89	91.5	0.97	2481	114	34	22	24	-7.5	-13.5	31.3	0.91	2.15	2.75
10	2	74	1.61	70.45	27.2	99	102	0.97	1377	107	28	22	11	0.1	7	7.3	0.92	2.01	2.14
11	2	74	1.56	68.7	28.2	89.7	103.6	0.87	1279	114	25	26	22	0	4.5	11.6	0.96	1.46	1.75
12	1	74	1.62	57.45	21.9	74.6	89.5	0.83	2914	104	42	20	18	-26.1	-13.5	60	1.05	1.17	1.97
13	2	73	1.56	72.5	29.8	104	110.3	0.94	1248	98	21	15	20	0	-10.4	3.9	0.79	1.42	2.18
14	2	73	1.54	56.5	23.8	88.1	90.5	0.97	1252	98	16	20	11	18.2	7	5.2	0.82	1.63	2.29
15	2	73	1.6	53.2	20.8	77.3	90	0.86	2183	103	25	17	20	4.3	-5.2	3	0.86	1.51	1.78
16	1	73	1.72	76.3	25.8	93.3	102.1	0.91	2553	108	35	20	15	-18.5	-11	20	0.86	2.34	2.47
17	2	73	1.59	64.9	25.7	88	102	0.86	2355	112	24	20	14	-11.4	-2.9	11.1	0.87	1.11	1.64
18	2	73	1.59	58.45	23.1	85.4	99.7	0.86	1468	93	24	23	17	0	-12	13.7	0.88	1.49	1.7
19	1	72	1.61	61.95	23.9	92.3	93.7	0.99	1350	100	29	18	17	-6.3	0	14.8	0.71	1.35	1.78
20	2	72	1.64	58.2	21.6	77	92.7	0.83	1835	75	18	15	13	1	1	5.7	0.74	1.42	1.44
21	2	72	1.5	47.05	20.9	78.6	83.4	0.94	1082	100	25	17	16	3.5	4	13.3	0.75	1.16	1.61
22	2	72	1.53	51.2	21.9	79	93	0.85	1865	109	16	15	17	-0.5	1	15.6	0.76	1.12	1.66
23	2	72	1.59	54.2	21.4	73.2	95.6	0.77	1011	106	15	17	11	-7.4	-13.4	21.2	0.76	1.06	1.46
24	2	72	1.62	51.5	19.6	77.2	94.8	0.81	439	112	15	24	14	-3.4	-13.8	3.5	0.82	0.89	1.22
25	1	72	1.71	72.4	24.8	89.5	95	0.94	2648	106	33	18	19	5.3	-6.7	4.6	0.83	1.1	1.31
26	2	72	1.56	59.25	24.3	84.7	98.6	0.86	1052	96	22	14	16	-20.3	0	7.7	0.85	1.25	1.56
27	2	72	1.6	59.15	23.1	87.6	98.4	0.89	1420	123	27	26	14	-11.1	7.6	16.3	0.88	1.26	1.52
28	2	72	1.58	56.85	22.8	85.7	98.3	0.87	1809	111	23	22	22	-7.8	-10.4	2.7	0.94	1.89	1.84
29	2	72	1.67	61.9	22.2	84.5	95.9	0.88	2185	124	33	20	15	4	11.3	26.6	0.97	2.26	2.52
30	1	72	1.67	65.9	23.6	87.3	94.8	0.92	3357	99	38	27	22	-10	16	60	0.98	1.4	1.82
31	1	72	1.71	69.45	23.8	86.5	98.6	0.88	2779	116	42	25	27	-13.6	-5.6	60	1.03	1.58	2.11
32	1	72	1.67	59.8	21.4	76.5	91.2	0.84	3445	114	35	22	26	-8.8	6.8	60	1.05	1.69	2.03
33	1	72	1.66	64.75	23.5	85.6	96.7	0.89	2822	118	34	24	15	-23.7	-24.1	19.3	1.07	1.25	1.64
34	1	72	1.67	65.1	23.3	84.8	89.1	0.95	2439	103	34	22	22	-11.6	-23.4	28.6	1.28	1.38	2.31
35	2	71	1.6	56.7	22.1	86.7	97.8	0.89	2292	96	23	12	10	-17.5	1.2	3.7	0.71	1.56	1.76
36	2	71	1.54	57.5	24.2	82	94	0.87	1705	104	20	15	18	4	2	17.1	0.78	1.47	1.72
37	1	71	1.8	82.8	25.6	97	106.5	0.91	3447	94	42	18	12	8.3	-12.2	35.5	0.8	1.92	2.09
38	2	71	1.54	49.85	21	75	91	0.82	1778	100	24	16	18	4.5	8.1	5.7	0.83	1.17	1.81
39	1	71	1.53	58.7	25.1	87	93	0.94	2633	99	33	20	15	1.5	3.6	33.4	0.88	1.17	1.52
40	2	71	1.58	63.25	25.3	85	100	0.85	1378	92	23	20	19	2.5	14.5	14.2	0.92	1.17	1.85
41	1	71	1.74	55.4	18.3	84.5	96	0.88	1240	106	30	22	20	-29.4	2.8	38.9	1.03	1.56	1.96
42	1	71	1.79	69.25	21.6	90	97	0.93	3268	109	44	25	24	13	11	60	1.13	1.69	2.11
43	2	71	1.62	61.9	23.6	80.2	91.3	0.9	2780	136	27	25	20	0.4	0.3	11.7	1.15	1.81	2.08
44	1	70	1.65	61.1	22.4	86	90	0.96	1547	77	36	18	13	-3.3	-20.5	8.3	0.74	1.07	1.37
45	1	70	1.68	63.8	22.6	84.9	95.6	0.89	2420	67	34	17	12	-8	3	60	0.78	1.23	1.67
46	2	70	1.63	62.4	23.5	80.3	98.3	0.82	1633	80	28	12	14	7	20	60	0.83	1.54	1.81
47	2	70	1.61	57.35	22.1	83.2	96.5	0.86	1590	95	21	17	22	2.7	-11.8	23.7	0.86	1.35	1.81
48	2	70	1.63	62.1	23.4	84.1	96.8	0.87	1822	84	24	16	13	2.9	0	60	0.88	1.26	1.68
49	1	70	1.56	62.2	25.6	89	99.5	0.89	2265	92	25	16	16	3.2	3.2	8.4	0.9	1.42	1.72
50	2	70	1.52	65.25	28.2	86.8	98.4	0.88	747	103	27	20	29	-16.6	-6.4	17.1	0.95	1.24	1.72
51	2	70	1.6	54.9	21.4	82.8	91.3	0.91	1706	106	23	16	13	-10.5	7.1	60	0.99	2.07	2.23
52	2	70	1.61	65.7	25.3	83.4	102.4	0.81	683	121	22	17	16	-2.6	-5.6	32.8	1.06	1.51	2.13
53	1	70	1.63	65.3	24.6	91.2	96.2	0.95	2230	110	37	29	26	-10.4	0	46.1	1.19	1.43	2.05
54	1	70	1.68	62.1	22	90.1	93.2	0.97	2954	108	44	29	25	-5.6	-18.1	60	1.25	1.46	1.66
55	2	69	1.61	57.45	22.2	85.1	96.8	0.88	2553	104	24	15	10	-10.1	-10.3	13.8	0.72	1.42	1.58
56	2	69	1.57	70.75	28.7	93.5	104.5	0.89	1102	101	22	19	22	-13.8	-3.3	10.6	0.74	1.31	1.85
57	2	69	1.61	53.6	20.7	82	95	0.86	2238	104	28	27	26	6	12	60	0.76	1.38	1.9
58	1	69	1.7	67.45	23.3	85.2	94.4	0.9	2695	101	39	20	16	-22.1	0.1	17.3	0.87	0.99	1.4
59	2	69	1.54	72.3	30.5	94.1	108.1	0.87	710	89	25	20	15	-7.2	-5.4	12.5	0.88	1.18	1.53
60	2	69	1.55	54.45	22.7	86.7	96	0.9	1091	104	26	16	14	3.5	0	28	0.92	1.56	2.12
61	2	69	1.54	54.9	23.1	81.2	95.3	0.85	2018	110	20	13	13	4.5	7.4	55.7	0.92	1.43	1.79
62	2	69	1.55	64.3	26.8	84.1	100.2	0.84	1499	93	20	22	16	-3.1	4.3	3.8	0.93	1.42	1.75
63	2	69	1.59	73.45	29.1	98	104	0.94	1429	123	25	26	19	-1.9	9	47.4	0.95	1.39	1.73
64	1	69	1.74	69.9	23.1	95.2	99.4	0.96	2132	114	29	19	24	2.2	-2	27.9	0.97	1.42	2.03
65	2	69	1.67	52.6	18.9	77.4	95.4	0.81	1353	105	22	16	12	4.1	-5.6	32	0.99	1.12	2.31
66	1	69	1.74	77.95	25.7	106.3	101	1.05	1678	99	34	22	13	4.5	-21.5	15.1	1.02	1.25	1.45
67	1	69	1.63	66.35	25	85.1	94.1	0.9	2311	102	39	19	22	2.5	5.4	28.6	1.05	1.12	1.91
68	2	69	1.6	65.1	25.4	91.2	107.5	0.85	1739	117	27	15	15	2.5	19.5	21.6	1.07	1.01	1.69
69	2	69	1.59	76.55	30.3	95.1	99.9	0.95	2410	135	33	25	16	0.1	10.1	13.1	1.11	1.55	1.92
70	2	69	1.6	60.05	23.5	84.1	89.8	0.94	1164	104	30	27	20	-3.3	-16.5	33.7	1.19	1.53	1.93
71	1	68	1.76	76.7	24.8	84.8	102.8	0.82	2805	100	45	22	16	-4.1	-12	7.7	0.74	1.78	2.14
72	2	68	1.61	77.6	29.9	98.8	107.8	0.92	1648	124	24	17	13	-7.5	-14.4	4.5	0.84	1.5	2.31
73	2	68	1.55	69.45	28.9	101	106	0.95	1783	110	25	19	20	-12.7	-3.8	31.1	0.84	1.2	1.58
74	2	68	1.52	54	23.4	86	97	0.89	1990	114	22	23	17	-7.5	20.1	2.9	0.84	1.17	1.61
75	2	68	1.6	63.35	24.7	82.5	92.5	0.89	1736	112	28	18	16	2.1	16.5	26.6	0.88	1.49	1.64
76	2	68	1.52	48.9	21.2	79.2	92.6	0.86	1012	96	29	18	18	8	0	60	0.89	1.26	1.71
77	2	68	1.53	50.75	21.7	73.4	93.7	0.78	882	80	19	16	20	1.5	6.3	35.5	0.9	1.14	1.63
78	1	68	1.64	62.7	23.3	90.5	96	0.94	2139	107	28	15	12	-23.3	-21.4	60	0.9	1.34	1.67
79	1	68	1.66	57.2	20.8	83	93	0.89	1463	108	29	17	23	-1	0	21.3	0.9	1.49	1.7
80	2	68	1.63	65.9	24.8	84.1	99.9	0.84	2069	120	29	18	12	-3.2	0.8	12	0.91	1.27	1.54
81	2	68	1.62	43.8	16.7	69	86	0.8	1934	98	26	19	21	10.2	15.7	60	0.93	1.45	1.63
82	1	68	1.75	73.9	24.1	94.5	99.1	0.95	2074	96	40	24	19	-7.5	0.9	50.1	0.97	1.36	2.05
83	2	68	1.59	59.9	23.7	83.4	93.5	0.89	2724	112	30	22	18	-6.5	5.5	50.9	0.97	1.36	1.98
84	2	68	1.55	46.15	19.2	79	88.8	0.89	935	96	28	20	16	4.1	-9.1	23.2	1.01	1.15	1.56
85	1	68	1.68	72.4	25.7	89	98	0.91	3878	108	33	24	18	-9.8	11.3	42	1.27	1.47	2.14
86	2	67	1.59	50.6	20	78.5	96	0.82	2044	110	20	20	20	1.5	5.6	60	0.67	1.13	1.49
87	2	67	1.6	64.6	25.2	89.7	100	0.9	1610	107	19	18	14	5.4	-16.3	52.8	0.74	1.26	1.76
88	1	67	1.64	64.85	24.1	88.6	103	0.86	3550	95	37	17	12	-23.2	-17.5	8.5	0.75	1.32	1.74
89	2	67	1.58	56.2	22.5	83	100	0.83	1928	112	27	16	19	5.5	13.5	39.9	0.76	1.67	1.92
90	2	67	1.62	59.8	22.8	88	100	0.88	1565	104	28	15	14	11.9	17.8	17.9	0.77	1.22	1.5
91	2	67	1.62	63.25	24.1	85.6	95.3	0.9	826	101	26	18	17	7.2	0	10.3	0.78	1.25	1.51
92	2	67	1.6	65.35	25.5	86.1	99.6	0.86	1960	90	20	18	15	4.8	-6.4	48.3	0.8	1.32	1.5
93	1	67	1.7	72.7	25.2	97	102	0.95	2560	115	41	28	29	3	1	60	0.83	1.6	1.9
94	2	67	1.62	57.1	21.8	81	92	0.88	1250	101	34	19	16	0.9	8.8	21.5	0.84	1.05	1.92
95	2	67	1.6	61.75	24.1	82.3	94.7	0.87	1559	119	27	19	24	4.8	19	60	0.89	1.36	1.94
96	1	67	1.7	66.5	23	92.7	96.4	0.96	2442	105	38	18	16	-7	0	32.6	0.91	2.06	2.29
97	1	67	1.72	68.2	23.1	89.2	91	0.98	1568	92	39	26	25	-9	-4	60	0.91	1.39	2.14
98	2	67	1.57	48.1	19.5	71	87	0.82	2137	116	22	20	26	9	19	18.3	0.92	1.55	1.79
99	2	67	1.53	51.7	22.1	72.3	87.5	0.83	2436	107	23	12	15	0.2	0.2	46.3	0.93	1.63	1.88
100	2	67	1.66	85.7	31.1	110	120	0.92	1576	108	40	25	25	-2.5	7.4	4.4	0.96	1.3	1.81
101	2	67	1.54	56.1	23.7	81.4	91	0.89	2215	96	22	12	10	-5.8	2.5	60	0.97	1.15	1.61
102	2	67	1.58	58.15	23.3	83.6	93.2	0.9	1106	120	28	18	20	1.6	1	60	0.98	1.48	1.72
103	2	67	1.52	51.05	22.1	76	89	0.85	1306	128	25	25	30	0	6	60	0.98	1.7	1.79
104	2	67	1.65	62.5	23	93.6	91.8	1.02	974	112	25	21	27	0	6	20.1	1.01	1.8	1.86
105	2	67	1.57	52.95	21.5	83.4	99.1	0.84	1051	116	21	15	12	2.5	18.7	60	1.05	1.43	1.93
106	2	67	1.57	63.95	25.9	87.3	98.8	0.88	1972	116	25	18	19	2.1	3.6	13.3	1.15	1.57	1.97
107	1	66	1.7	64.8	22.4	86.7	99.2	0.87	2179	93	31	21	18	-29	0	51.2	0.72	1.1	1.79
108	2	66	1.48	43.8	20	73.5	83.3	0.88	1749	78	22	15	19	2.5	5.2	13.4	0.72	1.15	1.51
109	2	66	1.57	70.55	28.6	92.6	109.2	0.85	1424	91	25	22	17	17.2	0	46	0.8	1.39	1.73
110	2	66	1.62	78	29.7	99.2	104.4	0.95	1267	110	31	16	16	-19.9	-6.1	60	0.85	1.3	1.85
111	2	66	1.66	60.75	22	82	98	0.84	1248	119	28	24	20	2.8	7.2	5	0.85	1.42	1.71
112	2	66	1.63	53.5	20.1	73.5	89.1	0.82	871	106	32	21	16	5.4	12.5	60	0.98	1.44	1.81
113	2	66	1.6	65.6	25.6	94.7	98.1	0.97	1101	110	22	19	22	1.8	0	60	0.99	1.43	1.72
114	1	66	1.75	79.4	25.9	92	99.8	0.92	3918	109	47	29	28	4.2	11.2	55.8	0.99	1.25	1.7
115	2	66	1.7	66.2	22.9	82.5	100	0.83	1359	92	36	20	23	7.5	6.4	33.4	0.99	1.57	2.09
116	2	66	1.57	43.25	17.5	68	87.5	0.78	1834	107	21	21	23	0	8.5	50.5	1	1.49	1.9
117	2	66	1.55	59.2	24.6	84.4	100.8	0.84	2081	125	32	20	17	-16.2	-2.4	50.9	1.01	2.4	1.81
118	1	66	1.59	66.65	26.4	82.1	102.1	0.8	2158	116	26	28	16	1.2	14.7	22.1	1.01	1.49	1.78
119	2	66	1.53	44.15	18.9	70.2	87.3	0.8	830	111	23	12	20	4.4	6.5	19.2	1.05	1.3	1.97
120	2	66	1.66	54.1	19.6	79.8	97.2	0.82	3260	120	29	23	18	7.2	15.8	11.2	1.09	1.63	1.94
121	2	66	1.68	68.8	24.4	83.5	97.6	0.86	1008	115	26	23	14	4.1	0	60	1.11	1.22	1.98
122	1	65	1.6	74.05	28.9	95	101	0.94	1556	89	29	26	30	-5	-3	6.1	0.72	1.35	1.67
123	1	65	1.67	59.1	21.2	81.3	91.7	0.89	1978	102	37	21	16	0.4	-20.3	1.3	0.8	1.32	1.6
124	2	65	1.61	63.15	24.4	80	100	0.8	1420	105	23	20	21	2.5	17.1	60	0.83	1.21	1.69
125	1	65	1.61	67.15	25.9	89.2	98.8	0.9	2140	96	37	13	15	-22.7	-8.4	60	0.84	1.5	1.73
126	2	65	1.55	60.2	25.1	90.2	105.1	0.86	1280	123	26	19	20	4.5	6.9	12.7	0.87	1.53	1.9
127	2	65	1.6	61.1	23.9	86.6	96.2	0.9	1744	105	27	15	11	0	2	27.3	0.88	2.34	2.52
128	2	65	1.55	46.05	19.2	69	85	0.81	1772	97	25	24	26	7	18	60	0.89	1.82	2.29
129	2	65	1.63	56.8	21.4	84.9	96.4	0.88	1886	113	21	23	15	4.5	2.8	33	0.9	1.69	1.84
130	2	65	1.62	59	22.5	84.4	97.9	0.9	2203	95	26	17	17	2.3	-3.4	46.1	0.95	1.53	1.8
131	2	65	1.62	50.7	19.3	78	94	0.83	1255	98	19	16	12	8.2	-4.1	48.4	0.95	1.18	2.49
132	2	65	1.63	54.5	20.5	78	89.5	0.87	2698	113	22	21	16	5	22.3	60	1.03	2	2.4
133	1	65	1.69	70.85	24.8	95	99	0.96	2360	100	38	25	22	1	4.5	60	1.07	1.29	2.11
134	2	65	1.58	73.1	29.3	98.4	111.5	0.88	1374	117	23	25	19	-27	2.2	8.1	1.09	2.34	2.59
135	2	65	1.62	61.05	23.3	77.5	94.7	0.82	2327	144	29	23	19	-3.2	4.5	60	1.11	1.58	1.96
136	2	65	1.61	70.8	27.3	85.2	103.9	0.82	1967	93	23	21	18	-4	9.2	36.2	1.11	2.06	2.63
137	2	65	1.6	60.8	23.7	83	101.4	0.82	2005	120	29	20	31	0	14.3	60	1.14	1.79	2.11
138	1	64	1.79	86.4	27	99.8	110	0.91	2341	101	43	29	15	-22.4	-12.2	16.4	0.76	1.37	1.66
139	2	64	1.68	64.85	23	89	99.3	0.9	1580	115	32	19	22	0.1	0.1	48	0.78	1.73	2.53
140	1	64	1.71	61.1	20.9	75.8	90.6	0.84	3027	108	42	17	13	-17.3	-16.9	4.2	0.83	1.16	1.5
141	1	64	1.65	72.9	26.8	93.5	93.3	1	1225	89	41	16	19	-27	-18.7	60	0.83	1.35	1.9
142	2	64	1.62	64.75	24.7	83.1	99.5	0.84	1756	120	21	19	14	3.1	6.5	17.9	0.85	1.44	1.63
143	2	64	1.61	57.2	22.1	78.4	92.8	0.84	1109	121	27	17	18	-2.4	-8.5	35.2	0.9	1.28	1.61
144	1	64	1.64	74	27.5	96.5	101	0.96	1965	119	40	24	19	-12	4.8	58	1	1.51	1.75
145	2	64	1.58	57.6	23.1	79.8	93.6	0.85	2118	106	21	17	13	0	12.8	40.7	1.01	1.43	1.76
146	2	64	1.65	64.1	23.5	82.5	93	0.89	3117	101	31	17	19	-25	8	60	1.01	1.24	2.14
147	1	64	1.69	71	24.9	90	101.5	0.89	3248	95	42	23	19	3.8	-4.3	60	1.06	1.49	1.91
148	1	63	1.64	69	25.7	92.1	98.2	0.94	2452	104	33	18	21	-10	-4	16.5	0.68	1.32	1.6
149	2	63	1.54	68.8	29	92.6	101.7	0.91	1981	88	31	15	21	0.5	4	60	0.69	1.27	1.69
150	2	63	1.66	59.45	21.6	83	99.5	0.83	1759	105	19	19	17	2.1	5.5	8.3	0.81	1.47	2.43
151	2	63	1.6	62.5	24.4	88	102	0.86	2201	120	27	23	16	-5.9	0	60	0.81	1.39	1.64
152	2	63	1.58	65.85	26.4	78.9	107.5	0.73	1799	108	23	26	22	-8.2	11.8	50.8	0.82	1.2	1.81
153	1	63	1.62	62.05	23.6	90	100	0.9	1688	118	36	26	31	13.5	0.5	17.8	0.82	1.34	1.71
154	2	63	1.6	50.85	19.9	73	93	0.78	2500	92	25	15	19	2	1	60	0.82	1.45	2.36
155	1	63	1.7	50.9	17.6	71	87	0.82	2235	87	37	19	16	4	18.5	60	0.84	1.68	2.17
156	2	63	1.66	57.9	21	87.6	99.1	0.88	2394	99	25	16	15	-2.5	0	60	0.86	1.32	1.56
157	2	63	1.52	47.4	20.5	85.4	94.3	0.91	1338	102	21	17	16	-21.2	5.3	2.2	0.87	1.32	1.59
158	2	63	1.66	51.55	18.7	75	94.5	0.79	1170	96	16	16	19	8	9	60	0.87	1.38	1.85
159	2	63	1.58	56.85	22.8	82.1	100.1	0.82	1955	121	30	22	17	-4.3	0.5	21.4	0.95	1.46	1.6
160	1	63	1.66	66.25	24	90.5	95.1	0.95	2468	119	40	27	21	-4.9	4.2	60	0.97	1.31	1.69
161	1	63	1.83	87.5	26.1	109	105	1.04	2156	90	36	25	23	10	-1	6.7	0.98	1.16	1.61
162	2	63	1.62	42.6	16.2	63.9	85.7	0.75	1789	99	21	14	19	7.6	9.1	60	1.04	1.65	1.86
163	1	63	1.61	63.7	24.6	89	90.2	0.99	1753	137	41	26	27	-23.3	0.1	3	1.06	1.94	2.7
164	1	63	1.57	53	21.5	75.2	93.1	0.81	2199	142	25	20	19	1.6	9.7	4.3	1.15	1.37	2.16
165	1	63	1.72	73.7	24.9	91.3	99.2	0.92	3287	110	35	21	19	-16.6	-17.9	13.3	1.19	1.55	1.84
166	2	62	1.69	63.9	22.4	85.6	98.8	0.87	1820	86	25	19	12	3.1	7.2	14.4	0.7	1.3	1.79
167	2	62	1.55	54.05	22.5	73	91	0.8	1890	138	23	22	20	12.6	12.5	60	0.84	1.27	2.04
168	2	62	1.63	61.1	23	83	88.6	0.94	657	96	27	18	15	1	-3	60	0.84	1.25	1.51
169	2	62	1.54	57.8	24.4	89.2	97.3	0.92	1197	89	29	19	17	4	14.3	28.6	0.87	1.31	1.69
170	1	62	1.71	84.75	29	96	100	0.96	2922	108	40	23	25	1	-6	17.7	0.95	1.76	2.52
171	2	62	1.59	63.25	25	87.2	100.8	0.87	1888	104	20	23	22	2.1	-2.8	54.5	0.96	1.15	1.82
172	2	62	1.63	59.5	22.4	83.9	100.2	0.84	2393	109	30	29	29	6.8	0	21.2	1.08	1.38	1.97
173	2	62	1.56	60.4	24.8	80.5	100	0.81	2239	138	28	27	22	-6.2	5.9	60	1.15	1.5	2.01
174	2	62	1.57	46.1	18.7	74.2	86.1	0.86	1619	106	20	18	14	0.6	0	2.1	1.19	1.54	1.98
175	2	61	1.64	65.3	24.3	89.6	102.3	0.88	1598	102	30	16	17	2.3	6.8	60	0.88	1.12	1.4
176	1	61	1.7	62.9	21.8	86.1	98.5	0.87	2570	117	43	25	25	-19.2	1.3	60	0.9	1.44	1.99
177	2	61	1.63	57.15	21.5	76	92	0.83	1482	90	22	18	20	6	14	35.3	0.94	1.69	1.92
178	2	61	1.63	59.7	22.5	87.1	92.1	0.95	1150	100	21	22	15	4.5	-21.2	58.5	0.96	1.24	1.6
179	2	61	1.59	73.15	28.9	92	101	0.91	2321	92	27	19	15	-10.5	0	10.7	0.99	1.38	1.71
180	2	61	1.47	50.2	23.2	87.6	95.9	0.91	287	103	28	8	17	-11.1	1	40.4	1.01	2.11	2.49
181	2	61	1.72	65.2	22	88.5	92.8	0.95	2740	142	28	19	18	0	-9.8	52.2	1.01	1.33	1.92
182	2	61	1.66	60	21.8	87	96.8	0.9	1129	101	29	21	18	1	7.5	60	1.2	1.53	1.86
183	2	61	1.6	63.1	24.6	89.7	96.7	0.9	895	108	23	21	15	-6.4	-2.3	35.4	1.21	1.54	1.81
184	2	60	1.67	65.3	23.4	82	93	0.88	1619	91	25	17	20	5	14.5	60	0.77	1.27	2.02
185	2	60	1.62	60.15	22.9	77.2	98	0.79	2262	108	23	24	19	5	10	29.6	0.81	1.44	1.89
186	2	60	1.57	43.3	17.6	70.8	85.4	0.83	2651	94	26	19	19	5.3	4.1	6.2	0.82	1.45	1.55
187	2	60	1.61	57.45	22.2	76	94	0.81	2968	96	29	16	20	10.5	19.1	32.5	0.89	1.29	1.81
188	2	60	1.51	49.75	21.8	71.5	92.8	0.77	1579	106	25	20	25	3.8	9.7	51.3	0.89	1.39	2.01
189	2	60	1.65	71	26.1	90.5	97.5	0.93	1654	92	27	26	25	-14.2	4.3	12.8	0.93	1.5	2.21
190	2	60	1.62	53.4	20.3	103	111	0.93	2642	104	30	16	19	3.9	10.4	60	0.94	1.72	2.03
191	2	60	1.64	65.75	24.4	93.6	98.1	0.95	1780	125	31	22	25	10.5	14	44.8	0.94	1.43	2.17
